# Supplementary material for: BRCA1-deficient mammary tumor cells are dependent on EZH2 expression and sensitive to Polycomb Repressive Complex 2-inhibitor 3-deazaneplanocin A
Source: PubMed Central journal article supplement (PMC2750125; doi:10.1186/bcr2354), 2009-08-26

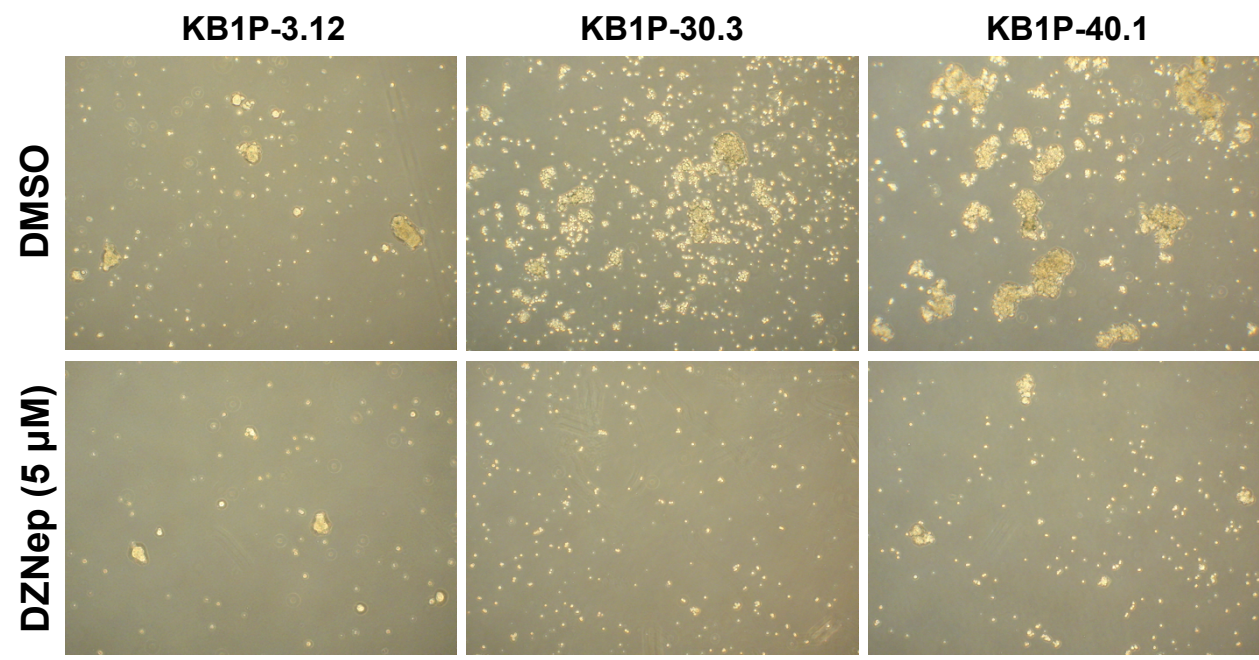

Supplement: bcr2354-S1.pdf [file bcr2354-S1.pdf]
